# Supplementary material for: Large-Scale Production of Anti-RNase A VHH Expressed in pyrG Auxotrophic Aspergillus oryzae
Source: MDPI journal article supplement (doi:10.3390/cimb45060304), 2023-05-31
Supplement: s1 [file s1]

Table S1: Comparison of heterologous expression systems in the field of VHH production

| Expressed VHH                                                                      | Heterologous expression system              | The yield for shake flask (mg/L) | The yield of fermenter (g/L) |
|------------------------------------------------------------------------------------|---------------------------------------------|----------------------------------|------------------------------|
| Anti-MUC1 VHH [36]                                                                 | <i>E. coli</i> BL21 (DE3)                   | 42-70                            | -                            |
| EGFR-specific VHH [37]                                                             | <i>E. coli</i> SHuffle® T7 and BL21 (DE3)   | Up to 200                        | -                            |
| MBP-fusion VHH [38]                                                                | <i>E. coli</i> HM140                        | 12                               | -                            |
| VHH against azo dyes [40]                                                          | <i>S. cerevisiae</i> VWK18gal1-             | 0.07-0.12                        | 0.463 and 0.608              |
| VHH against azo-dye RR6 [65]                                                       | <i>S. cerevisiae</i> SU51                   | ~ 100                            | -                            |
| Anti-EGFR VIII VHH [42]                                                            | <i>P. pastoris</i> X-33                     | 8-10                             | -                            |
| Anti-AahI scorpion toxin nanobody [43]                                             | <i>P. pastoris</i> X-33                     | ~ 17                             | -                            |
| Anti-CEACAM5 nanobody [66]                                                         | <i>P. pastoris</i> GS115                    | 51.7                             | -                            |
| Anti-MUC1 VHH [67]                                                                 | <i>P. pastoris</i> GS115                    | 10-15                            | -                            |
| VHH against azo dye R2 [69]                                                        | <i>A. awamori</i> pyrG mutant               | up to 7.5                        | -                            |
| <i>Arthromyces ramosus</i> peroxidase gene (arp) fused VHH against R9 azo dye [70] | <i>A. awamori</i> pyrG mutant               | 10-30                            | -                            |
| sTAA-VHH and sTAA-N28-VHH against EGFR [71]                                        | <i>A. oryzae</i> niA mutant                 | 21 and 73.8                      | -                            |
| Glucoamylase fused VHH against human chorionic gonadotropin [72]                   | <i>A. oryzae</i> OSI1013 <i>leuA</i> mutant | 155 and 610                      | -                            |
| <i>Asp.</i> VHH (in this study)                                                    | <i>A. oryzae</i> RIB40 pyrG(-)              | 44                               | 1.4                          |
